# Supplementary material for: Alterations in Brain Network Topology and Structural-Functional Connectome Coupling Relate to Cognitive Impairment
Source: PubMed Central journal article supplement (PMC6300727; doi:10.3389/fnagi.2018.00404), 2018-12-13
Supplement: Data_Sheet_1.pdf [file Data_Sheet_1.pdf]

## SUPPLEMENTARY MATERIALS

### Supplementary Methods

#### *Graph theoretical analyses*

The weighted clustering coefficient of a node  $i$  represents the fraction of the node's neighbors that are also neighbors of each other. It is defined as:

$$C_i^w = \frac{\sum_{j,h \in N} (w_{ij} w_{jh} w_{ih})^{1/3}}{k_i (k_i - 1)},$$

where  $N$  is the number of nodes and  $K_i$  is the degree of node  $i$ . Subsequently, the network weighted clustering coefficient is defined as the average of all nodes' clustering coefficient (Saramaki et al., 2007):

$$C_{net}^w = \frac{1}{N} \sum_{i=1}^N C_i^w.$$

The path length between nodes  $i$  and  $j$  was defined as the sum of the edge lengths, which is computed as  $1/w_{ij}$ , along the path connecting the nodes to each other without passing the other nodes more than once. Then, the shortest path length between nodes  $i$  and  $j$ ,  $L_{ij}$  was calculated as the path with the shortest length between the two nodes. The weighted characteristic path length of network,  $L_{net}^w$ , quantifies the ability for information propagation in parallel. It was measured by a harmonic mean length between pairs (Watts and Strogatz, 1998; Newman, 2003), to overcome the problem of possibly disconnected network components. Formally,  $L_{net}^w$  is computed as follows:

$$L_{net}^w = \frac{1}{\frac{1}{N(N-1)} \sum_{i=1}^N \sum_{i \neq j=1}^N \frac{1}{L_{ij}}}.$$

**Supplementary Table 1. Brain regions (ROI 126 parcellation) with significant group differences in structural and functional brain connectome nodal-wise metrics.** For each of 126 brain regions defined from a previous study (Yeo et al., 2011), we performed multiple linear regression to do pairwise comparisons for each nodal-wise metric, controlling for age, gender and handedness. Uncorrected  $p < 0.01$  was considered indicative of a significant difference. Data in parentheses are p values. SC = structural connectome; FC = functional connectome; DN-A\_PFCd = Default network part A, prefrontal cortex dorsal; CN-B\_Temp = Control network part B, temporal region; SMN-B\_Cent = Somatomotor network part B, central; SVAN-B\_PFCv = Salience ventral attention network part B, prefrontal cortex ventral; DN-B\_PFCv = Default network part B, prefrontal cortex ventral; SVAN-A\_INS = Salience ventral attention network part A, insula; SVAN-B\_PFCl = Salience ventral attention network part B, prefrontal cortex lateral; DAN-A\_SPL = Dorsal attention network part A, superior parietal lobule); DN-B\_Temp = Default network part B, temporal region; SVAN-A\_INS = Salience ventral attention network part A, insula; SMN-B\_Cent = Somatomotor network part B, central; CN-A\_Temp = Control network part A, temporal region; L = left hemisphere and R = right hemisphere.

|                             | ROI                         | T stats of pairwise comparisons |                      |                            |    |
|-----------------------------|-----------------------------|---------------------------------|----------------------|----------------------------|----|
|                             |                             | NCI vs mild CIND                | NCI vs moderate CIND | Mild CIND vs moderate CIND |    |
| <b>SC degree centrality</b> | R Thalamus                  | NS                              | 3.10(.002)           | NS                         |    |
|                             | L SVAN-A_INS                | NS                              | NS                   | 2.88(.005)                 |    |
|                             | R SVAN-B_PFCI               | NS                              | NS                   | 2.74(.007)                 |    |
|                             | L DAN-A_SPL                 | -2.63(.009)                     | NS                   | NS                         |    |
|                             |                             |                                 |                      |                            |    |
| <b>SC nodal efficiency</b>  | R Thalamus                  | NS                              | 3.53(.0005)          | NS                         |    |
|                             | R SMN-B_Cent                | NS                              | 3.11(.002)           | NS                         |    |
|                             | R DN-B_PFCv                 | NS                              | 3.04(.003)           | NS                         |    |
|                             | L DN-A_PFCd                 | NS                              | 2.76(.006)           | NS                         |    |
|                             | R SVAN-B_PFCv               | NS                              | 2.76(.006)           | NS                         |    |
|                             | L CN-B_Temp                 | NS                              | 2.74(.007)           | NS                         |    |
|                             | R SVAN-B_PFCI               | NS                              | NS                   | 3.41(.0009)                |    |
|                             | L SVAN-A_INS                | NS                              | NS                   | 3.08(.003)                 |    |
|                             | R SVAN-A_INS                | NS                              | NS                   | 2.81(.006)                 |    |
|                             |                             |                                 |                      |                            |    |
|                             | <b>FC degree centrality</b> | L DN-B_Temp                     | NS                   | 3.22(.002)                 | NS |
|                             |                             | R SVAN-A_INS                    | NS                   | -2.71(.007)                | NS |
|                             |                             | R CN-A_Temp                     | 2.82(.005)           | NS                         | NS |
|                             |                             |                                 |                      |                            |    |
| <b>FC nodal efficiency</b>  | R SMN-B_Cent                | NS                              | 2.65(.009)           | NS                         |    |

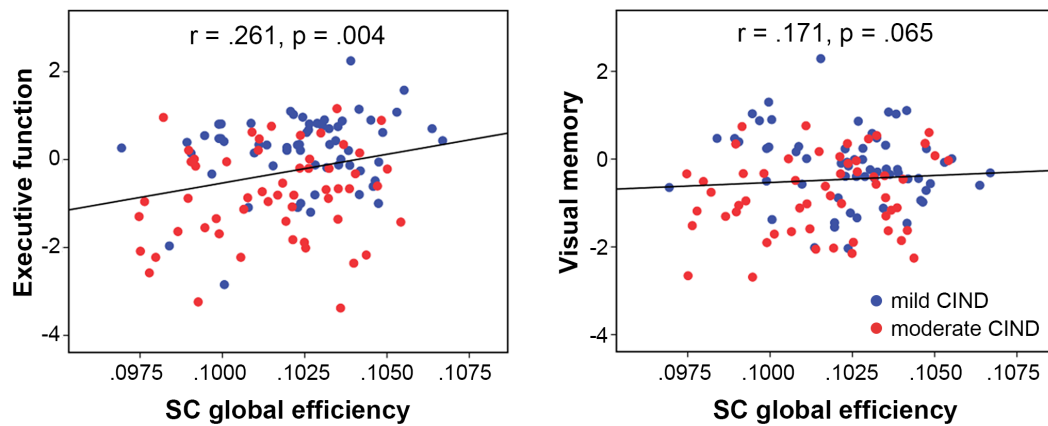

**Figure S1. Greater structural global efficiency was related to better executive function and visual memory performance in CIND patients.** The cognitive performance was presented as standard residual z-scores controlled for age, gender, and handedness.

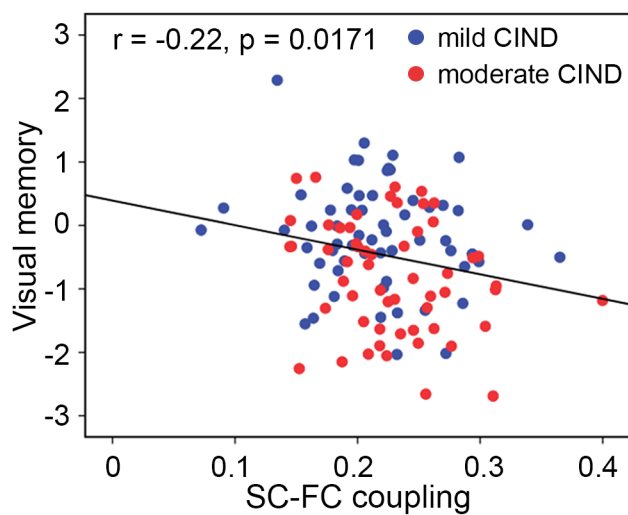

**Figure S2. Higher SC-FC coupling was related to poorer visual memory in CIND patients.** The cognitive performance was presented as standard residual z-scores controlled for age, gender, and handedness.

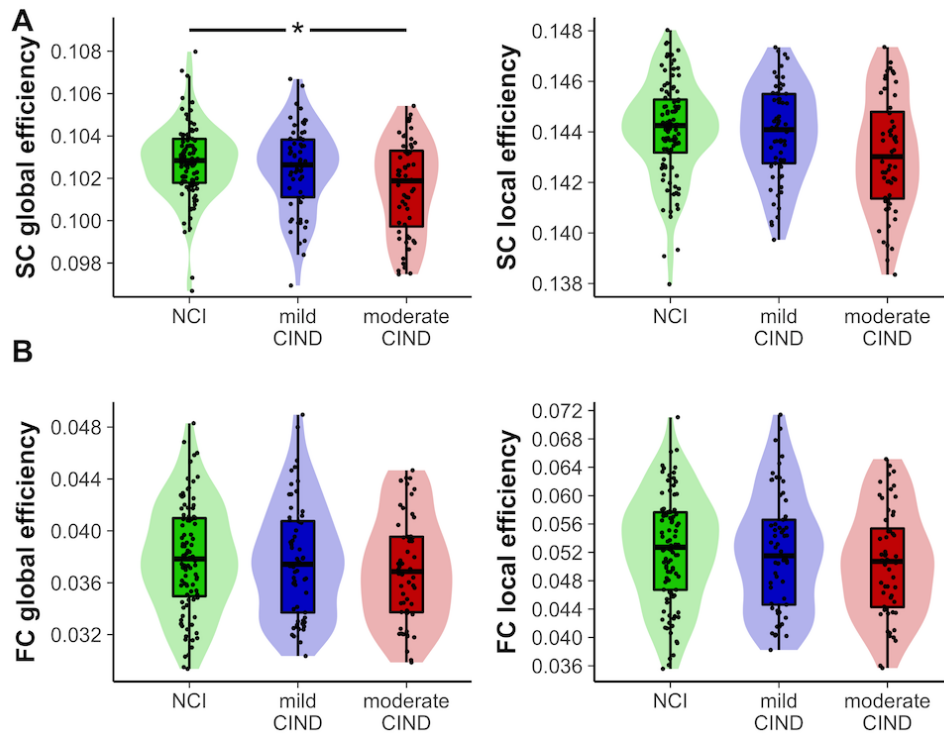

**Figure S3. Participants with moderate CIND had reduced network efficiency in brain structural connectome (SC).** (A) In SC, participants with moderate CIND (but not mild CIND) showed significant reduction in global but not local efficiency compared to participants with no cognitive impairment (NCI) ( $p < 0.05$ , marked by \*). (B) In contrast, there was no group difference in functional connectome (FC) global-wise metrics across groups. Shades represent density of data points of the respective graph metric.

## References

- Newman, M.E.J. (2003). The structure and function of complex networks. *Siam Review* 45(2), 167-256. doi: Pii S0036144503424804  
 Doi 10.1137/S003614450342480.
- Saramaki, J., Kivela, M., Onnela, J.P., Kaski, K., and Kertesz, J. (2007). Generalizations of the clustering coefficient to weighted complex networks. *Phys Rev E Stat Nonlin Soft Matter Phys* 75(2 Pt 2), 027105. doi: 10.1103/PhysRevE.75.027105.
- Watts, D.J., and Strogatz, S.H. (1998). Collective dynamics of ‘small-world’ networks. *Nature* 393(6684), 440-442.
- Yeo, B.T., Krienen, F.M., Sepulcre, J., Sabuncu, M.R., Lashkari, D., Hollinshead, M., et al. (2011). The organization of the human cerebral cortex estimated by intrinsic functional connectivity. *J Neurophysiol* 106(3), 1125-1165. doi: 10.1152/jn.00338.2011.
